# Supplementary material
Source: publisher figshare collection journal article supplement (https://acs.figshare.com/ndownloader/files/4180246)
Supplement: Supplementary file 1 [file 4180246]

# Supplementary Information

## Taper $\text{PbZr}_{0.2}\text{Ti}_{0.8}\text{O}_3$ Nanowire Arrays: From Controlled Growth by Pulsed Laser Deposition to Piezopotential Measurements

*Yu-Ze Chen<sup>1,†</sup>, Te-Hsiang Liu<sup>2,†</sup>, Cheng-Ying Chen<sup>3,4</sup>, Chin-Hung Liu<sup>1</sup>, Szu-Ying Chen<sup>1</sup>, Wen-Wei Wu<sup>2</sup>,  
Zhong Lin Wang<sup>3</sup>, Jr-Hau He<sup>4</sup>, Ying-Hao Chu<sup>2</sup>, Yu-Lun Chueh<sup>1,\*</sup>*

<sup>1</sup>*Department of Materials Science and Engineering, National Tsing Hua University, Hsinchu, 30013, Taiwan, R.O.C.*

<sup>2</sup>*Department of Materials Science and Engineering, National Chiao Tung University, Hsinchu, 30013, Taiwan, R.O.C.*

<sup>3</sup>*School of Materials Science and Engineering, Georgia Institute of Technology, Atlanta, Georgia 30332-0245, United States*

<sup>4</sup>*Department of Electrical Engineering and Institute of Photonics and Optoelectronics, National Taiwan University, Taipei 10617, Taiwan, R.O.C.*

† These authors contributed equally to this work.

\*Correspondence should be addressed to Y.L.C. ([ylchueh@mx.nthu.edu.tw](mailto:ylchueh@mx.nthu.edu.tw))

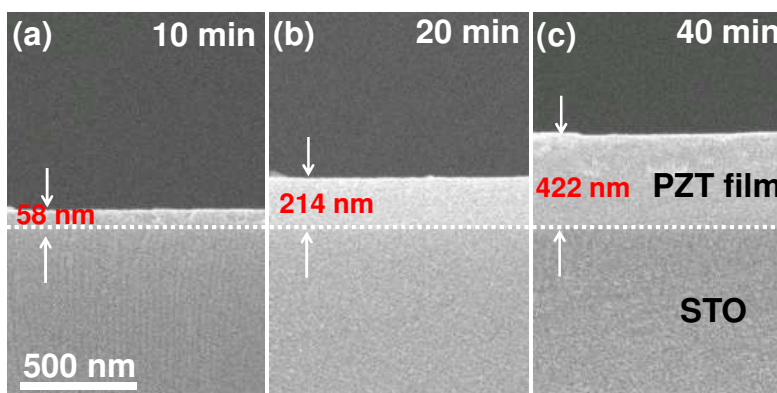

Figure S1 SEM images of the PZT thin film grown at 700 °C with the oxygen pressure of 400 mTorr at different growth time from (a) 10 min, (b) 20 min, and (c) 40 min, respectively.

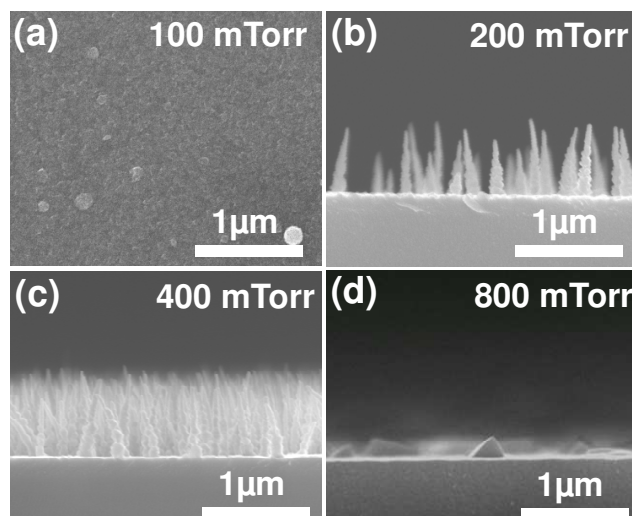

Figure S2 SEM images of PZT NWAs grown at the substrate temperature of 750 °C for 20 min with oxygen pressures varied from (a) 100 mTorr, (b) 200 mTorr, (c) 400 mTorr, and (d) 800 mTorr, respectively.

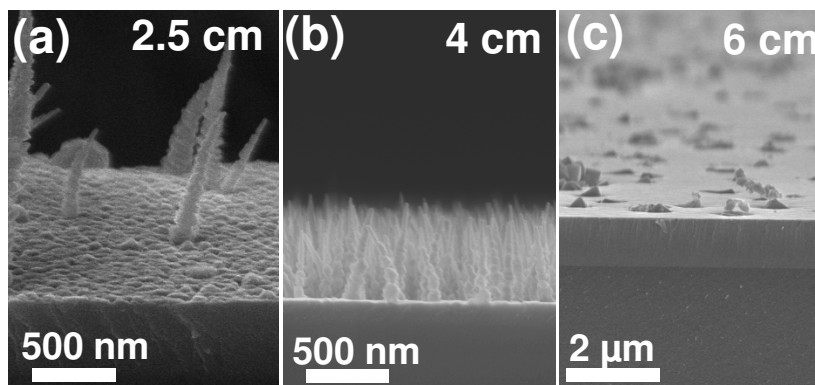

Figure S3 SEM images of PZT NWAs grown at different distances between PZT target and STO substrate from (a) 2.5 cm, (b) 4 cm, and (c) 6 cm with the growth pressure and the substrate temperature of 400 mTorr and 750 °C for 20 min, respectively.

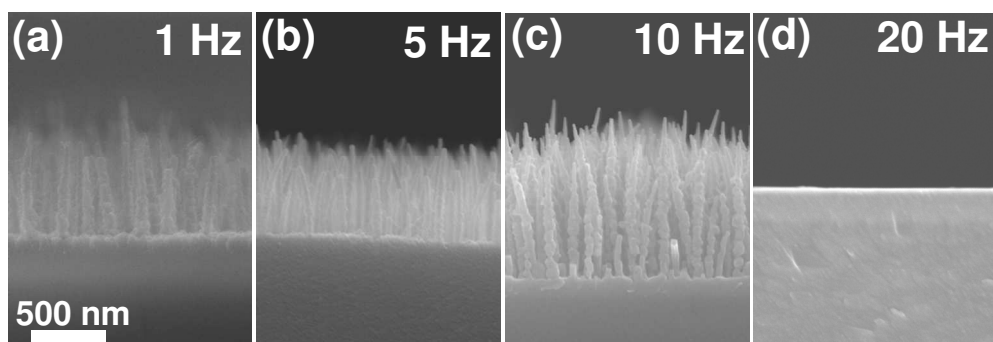

Figure S4 SEM images of PZT NWAs grown at different laser frequencies from (a) 1 Hz, (b) 5 HZ, (c) 10 Hz, and (d) 20 Hz with growth pressure and substrate temperature of 40 mTorr and 750 °C for 20 min, respectively.

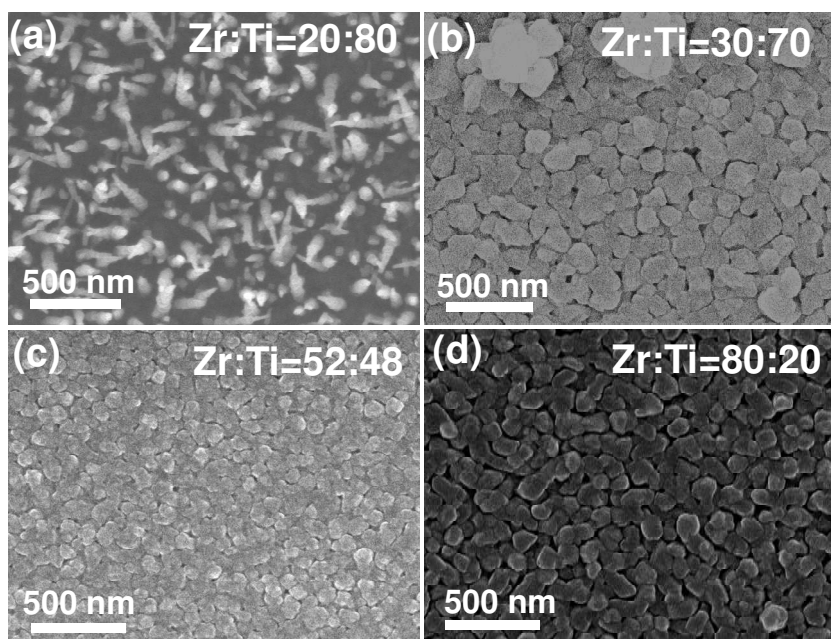

Figure S5. SEM images of PZT NWAs grown by different PZT targets with atomic ratios of Zr/Ti at (a) 20/80, (b) 30/70, (c) 52/48, (d) 80/20 on STO substrate, respectively.

### **Piezopotential simulation:**

The Lippman theory was utilized to calculate the piezopotential distribution in a bent PZT NW. All of the calculations were carried out using the COMSOL 3.5a version package software, which is multiphysics engineering simulation software environment facilitating all steps, namely, defining your geometry, specifying your physics, and then visualizing your results in the modeling process. (More details please refer to <http://www.comsol.com/>) In this simulation, the bottom side of the bent PZT NW was ground. The material constants used in the calculation are: relative dielectric constants of PZT:  $\kappa_{\perp}=504.1$ ,  $\kappa_{\parallel}=270$ , the density:  $\rho = 7600 \text{ kg/m}^3$ , the anisotropic elastic constants:  $C_{11} = 134.8680 \text{ GPa}$ ,  $C_{12} = 67.8883 \text{ GPa}$ ,  $C_{13} = 68.0876 \text{ GPa}$ ,  $C_{33} = 113.297 \text{ GPa}$ ,  $C_{44} = 22.2222 \text{ GPa}$ , and the piezoelectric constants:  $e_{15} = 9.77778 \text{ C/m}^2$ ,  $e_{31} = -1.81603 \text{ C/m}^2$ ,  $e_{33} = 9.05058 \text{ C/m}^2$ . Length and diameter of the [001]-orientated PZT NW were set to be 200 nm and 50 nm, respectively. The applied  $f$  was set to be 80 nN. A semi-quantitative comprehension can be realized by a numerical calculation without considering the carrier concentration by taking the relative dielectric constants of PZT:  $\kappa_{\perp}=504.1$ ,  $\kappa_{\parallel}=270$ , the density:  $\rho = 7600 \text{ kg/m}^3$ , the anisotropic elastic constants:  $C_{11} = 134.8680 \text{ GPa}$ ,  $C_{12} = 67.8883 \text{ GPa}$ ,  $C_{13} = 68.0876 \text{ GPa}$ ,  $C_{33} = 113.297 \text{ GPa}$ ,  $C_{44} = 22.2222 \text{ GPa}$ , and the piezoelectric constants:  $e_{15} = 9.77778 \text{ C/m}^2$ ,  $e_{31} = -1.81603 \text{ C/m}^2$ ,  $e_{33} = 9.05058 \text{ C/m}^2$  into account, respectively
